# Supplementary material
Source: PubMed Central journal article supplement (PMC3562426)
Supplement: NIHMS408102-supplement-supplement_1.pdf [file NIHMS408102-supplement-supplement_1.pdf]

List of Supplemental Digital Content (1 item)

Kaur ADAD manuscript Supplement Table 1.docx

Supplement Table 1. Results of the stepwise logistic regression model using  $\geq 1$  cutoff for all components of resting tremor and for the gait component in Impaired Posture/Gait. This model produced an 84.8% concordance rate in discriminating AD from LB disease (DLB+LBV).

|                        | Estimate | SE   | p-value | OR   | 95% CI    |
|------------------------|----------|------|---------|------|-----------|
| Masked Facies          | 1.62     | 0.28 | <0.001  | 5.0  | 2.9-8.8   |
| Impaired Posture/Gait  | 1.3      | 0.21 | <0.001  | 3.8  | 2.5-5.8   |
| Speech/Hypophonia      | 1.1      | 0.37 | 0.003   | 3.1  | 1.5-6.4   |
| Rigidity               | 0.91     | 0.22 | <0.001  | 2.5  | 1.6-3.8   |
| Bradykinesia           | 0.68     | 0.21 | 0.001   | 2.0  | 1.3-3.0   |
| Action/Postural Tremor | 0.70     | 0.27 | 0.009   | 2.0  | 1.2-3.4   |
| Resting Tremor         | 0.56     | 0.23 | 0.01    | 1.8  | 1.1-2.7   |
| Gender: Male           | 0.84     | 0.19 | <0.001  | 2.3  | 1.6-3.4   |
| MMSE                   | 0.09     | 0.02 | <0.001  | 1.1  | 1.06-1.13 |
| Education              | -0.03    | 0.02 | 0.29    | 0.97 | 0.93-1.02 |
| Age                    | -0.08    | 0.01 | <0.001  | 0.92 | 0.89-0.94 |

Intercept=  $-4.63 \pm 0.53$
